# Supplementary material for: Effect of Inquiry-Based Stress Reduction (IBSR) Intervention on Well-Being, Resilience and Burnout of Teachers during the COVID-19 Pandemic
Source: MDPI journal article supplement (doi:10.3390/ijerph18073689), 2021-04-01
Supplement: s1 [file s1]

Supplementary Materials: **Table S1**  
Judge Your Neighbor Worksheet

# Judge-Your-Neighbor Worksheet

Think of a stressful situation with someone—for example, an argument. As you meditate on that specific time and place and begin to feel what that felt like, fill in the blanks below. Use short, simple sentences.

1. In this situation, who angers, confuses, hurts, saddens, or disappoints you, and why?

I am \_\_\_\_\_ with \_\_\_\_\_ because \_\_\_\_\_  
emotion name

*I am angry with Paul because he lied to me.*

- WANTS 2. In this situation, how do you want him/her to change? What do you want him/her to do?

I want \_\_\_\_\_ to \_\_\_\_\_  
name

*I want Paul to see that he is wrong. I want him to stop lying to me.*

- ADVICE 3. In this situation, what advice would you offer him/her? "He/she should/shouldn't..."

\_\_\_\_\_ should/shouldn't \_\_\_\_\_  
name

*Paul shouldn't frighten me with his behavior. He should take a deep breath.*

- NEEDS 4. In order for you to be happy in this situation, what do you need him/her to think, say, feel, or do?

I need \_\_\_\_\_ to \_\_\_\_\_  
name

*I need Paul to stop talking over me. I need him to really listen to me.*

- COMPLAINTS 5. What do you think of him/her in this situation? Make a list. (It's okay to be petty and judgmental.)

\_\_\_\_\_ is \_\_\_\_\_  
name

*Paul is a liar, arrogant, loud, dishonest, and unconscious.*

6. What is it about this person and situation that you don't ever want to experience again?

I don't ever want \_\_\_\_\_

*I don't ever want Paul to lie to me again. I don't ever want to be disrespected again.*

Now question each of your statements, using the four questions of The Work, below. For the turnaround to statement 6, replace the words *I don't ever want...* with *I am willing to...* and *I look forward to...*

**The four questions**

*Example: Paul lied to me.*

1. Is it true? (Yes or no. If no, move to question 3.)
2. Can you absolutely know that it's true? (Yes or no.)
3. How do you react, what happens, when you believe that thought?
4. Who or what would you be without the thought?

**Turn the thought around.**

*I lied to me.*

*I lied to Paul.*

*Paul didn't lie to me.*

*Paul told me the truth.*

As you visualize the situation, contemplate how each turnaround is as true or truer.

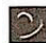

THE WORK OF BYRON KATIE © 2019 Byron Katie International, Inc. All rights reserved. thework.com

**Table S2.**

Differences between study participants and dropouts.

|                                    |                          | Study participants<br>(N= 60) | Dropouts<br>(N=7) | T-test between groups              |         |
|------------------------------------|--------------------------|-------------------------------|-------------------|------------------------------------|---------|
|                                    |                          | Mean (SD)                     | Mean (SD)         | Test statistic                     | P value |
| <b>Age (yrs)</b>                   |                          | 45.3 (9.1)                    | 42.4 (10.6)       | T= 0.79                            | 0.431   |
| <b>Education (yrs)</b>             |                          | 17.5 (2.6)                    | 18.9 (7.4)        | T= 1.04                            | 0.303   |
| <b>Seniority<sup>a</sup> (yrs)</b> |                          | 16.3 (9.7)                    | 15.4 (10.7)       | T= 0.21                            | 0.832   |
| <b>Job percent (%)</b>             |                          | 92.5 (14.3)                   | 92.3 (7.6)        | T= 0.03                            | 0.973   |
| <b>Gender<sup>b</sup></b>          | Female                   | 52 (86.7%)                    | 6 (85.7%)         | X <sup>2</sup> = 0.00 <sup>a</sup> | 0.944   |
|                                    | Male                     | 8 (13.3%)                     | 1 (14.3%)         |                                    |         |
| <b>Marital status<sup>b</sup></b>  | Single                   | 5 (8.3%)                      | 2 (28.6%)         | X <sup>2</sup> = 5.09 <sup>a</sup> | 0.278   |
|                                    | Married without children | 3 (5.0%)                      | 0 (0.0%)          |                                    |         |
|                                    | Married with children    | 44 (73.3%)                    | 3 (42.9%)         |                                    |         |
|                                    | Divorced                 | 7 (11.7%)                     | 2 (28.6%)         |                                    |         |
|                                    | widowed                  | 1 (1.7%)                      | 0 (0.0%)          |                                    |         |
|                                    |                          |                               |                   |                                    |         |
| <b>Economic<sup>b</sup></b>        | Below average            | 5 (30%)                       | 1 (14.3%)         |                                    | 0.641   |
|                                    | Average                  | 37 (61.7%)                    | 5 (71.4%)         |                                    |         |
|                                    | Above average            | 18 (8.3%)                     | 1 (14.3%)         |                                    |         |
| <b>PERMA</b>                       |                          | 156.2 (20.2)                  | 160.4 (18.6)      | T= 0.52                            | 0.604   |
| <b>SWLS</b>                        |                          | 25.5 (5.4)                    | 26.0 (4.8)        | T= 0.23                            | 0.821   |
| <b>PANAS-P</b>                     |                          | 39.4 (5.4)                    | 36.7 (5.7)        | T= 1.22                            | 0.227   |
| <b>PANAS-N</b>                     |                          | 18.5 (6.1)                    | 18.4 (4.9)        | T= 0.04                            | 0.963   |
| <b>BRS</b>                         |                          | 3.3 (0.8)                     | 3.4 (0.5)         | T= 0.17                            | 0.865   |
| <b>MBI EE</b>                      |                          | 11.3 (5.6)                    | 16.3 (6.2)        | T= 2.19                            | 0.032*  |
| <b>MBI PA</b>                      |                          | 9.2 (5.3)                     | 12.4 (6.9)        | T= 1.48                            | 0.143   |
| <b>MIT S</b>                       |                          | 74.5 (7.2)                    | 77.4 (5.7)        | T= 1.04                            | 0.300   |
| <b>PSS</b>                         |                          | 36.5 (10.2)                   | 31.4 (10.7)       | T= 1.24                            | 0.216   |

Abbreviations: PERMA, positive emotion, engagement, relationships, meaning, and accomplishment; SWLS, Satisfaction with Life Scale; PANAS, Positive and Negative Affect Scale; BRS, Brief Resilience Scale; MBI, Maslach Burnout Inventory, EE- emotional exhaustion, PA- personal accomplishment; MIT S, Mindfulness in Teaching Scale; PSS, Perceived Stress Scale;

ANOVA, analysis of variance; SD, standard deviation.

\* p-value of <0.05 indicating statistical significance.

<sup>a</sup> How many years have you been in the teaching profession?

<sup>b</sup> N (% within group)

**Table S3**

Differences in baseline outcomes between younger (age≤46 years) and elder (age>46 years) participants.

|                              | Younger<br>participants<br>(N=34) | Elder<br>Participants<br>(N=33) | Difference between groups |            |
|------------------------------|-----------------------------------|---------------------------------|---------------------------|------------|
|                              | Mean (SD)                         | Mean (SD)                       | Test statistic            | P<br>value |
| <b>PERMA<sup>d</sup></b>     | 153.9 (21.9)                      | 159.7 (17.5)                    | F= 1.39                   | 0.244      |
| <b>SWLS<sup>b,d</sup></b>    | 26.4 (5.6)                        | 24.8 (4.9)                      | F= 1.53                   | 0.220      |
| <b>PANAS-P<sup>a,c</sup></b> | 57.7 (7.6)                        | 61.9 (6.9)                      | F= 4.70                   | 0.034*     |
| <b>PANAS-N<sup>d</sup></b>   | 17.6 (5.9)                        | 19.5 (5.9)                      | F= 1.65                   | 0.204      |
| <b>BRS<sup>d</sup></b>       | 3.4 (0.8)                         | 3.3 (0.9)                       | F= 0.46                   | 0.502      |
| <b>MBI EE</b>                | 12.4 (5.9)                        | 11.3 (5.7)                      | F= 0.60                   | 0.441      |
| <b>MBI PA</b>                | 9.7 (5.5)                         | 9.3 (5.6)                       | F= 0.08                   | 0.785      |
| <b>MITS</b>                  | 74.9 (7.7)                        | 74.6 (6.6)                      | F= 0.04                   | 0.849      |
| <b>PSS</b>                   | 35.6 (10.7)                       | 36.4 (9.9)                      | F= 0.08                   | 0.778      |

Abbreviations: PERMA, positive emotion, engagement, relationships, meaning, and accomplishment; SWLS, Satisfaction with Life Scale; PANAS, Positive and Negative Affect Scale; BRS, Brief Resilience Scale; MBI, Maslach Burnout Inventory, EE- emotional exhaustion, PA- personal accomplishment; MITS, Mindfulness in Teaching Scale; PSS, Perceived Stress Scale;

\* p-value of <0.05 indicating statistical significance.

N (% within group)

<sup>a</sup> N (Younger)= 30

<sup>b</sup> N (Younger)= 33

<sup>c</sup> N (Elder)= 30

<sup>d</sup> N (Elder)= 32

**Table S4**

Differences in baseline outcomes between male and female participants.

|                            | Female<br>participants<br>(N=58) | Male<br>Participants<br>(N=9) | t-test between groups |            |
|----------------------------|----------------------------------|-------------------------------|-----------------------|------------|
|                            | Mean (SD)                        | Mean (SD)                     | Test statistic        | P<br>value |
| <b>PERMA<sup>a</sup></b>   | 156.4 (20.2)                     | 158.4 (19.1)                  | T= 0.25               | 0.800      |
| <b>SWLS<sup>a,b</sup></b>  | 25.2 (5.3)                       | 28.4 (4.1)                    | T= 1.63               | 0.109      |
| <b>PANAS-P<sup>b</sup></b> | 39.0 (5.6)                       | 39.3 (4.7)                    | T= 0.15               | 0.880      |
| <b>PANAS-N<sup>b</sup></b> | 18.9 (6.2)                       | 15.8 (2.8)                    | T= -1.49              | 0.139      |
| <b>BRS<sup>a</sup></b>     | 3.3 (0.8)                        | 3.7 (0.5)                     | T= 1.48               | 0.143      |
| <b>MBI EE</b>              | 12.2 (5.8)                       | 9.5 (5.6)                     | T= -1.26              | 0.210      |
| <b>MBI PA</b>              | 9.8 (5.6)                        | 7.8 (4.6)                     | T= -1.02              | 0.313      |
| <b>MITS</b>                | 74.9 (7.1)                       | 73.8 (7.4)                    | T= -0.45              | 0.654      |
| <b>PSS</b>                 | 35.4 (10.4)                      | 39.5 (8.9)                    | T= 1.12               | 0.268      |

Abbreviations: PERMA, positive emotion, engagement, relationships, meaning, and accomplishment; SWLS, Satisfaction with Life Scale; PANAS, Positive and Negative Affect Scale; BRS, Brief Resilience Scale; MBI, Maslach Burnout Inventory, EE- emotional exhaustion, PA- personal accomplishment; MITS, Mindfulness in Teaching Scale; PSS, Perceived Stress Scale;

\* p-value of <0.05 indicating statistical significance.

N (% within group)

<sup>a</sup> N (Male)= 8

<sup>b</sup> N (Female)= 57

**Table S5**

Cronbach's Alpha of research questionnaires.

|         | Cronbach's Alpha<br>before |
|---------|----------------------------|
| PERMA   | $\alpha = 0.812$           |
| SWLS    | $\alpha = 0.810$           |
| PANAS-P | $\alpha = 0.770$           |
| PANAS-N | $\alpha = 0.841$           |
| BRS     | $\alpha = 0.824$           |
| MBI EE  | $\alpha = 0.877$           |
| MBI PA  | $\alpha = 0.799$           |
| MITS    | $\alpha = 0.707$           |
| PSS     | $\alpha = 0.859$           |

Abbreviations: PERMA, positive emotion, engagement, relationships, meaning, and accomplishment; SWLS, Satisfaction with Life Scale; PANAS, Positive and Negative Affect Scale; BRS, Brief Resilience Scale; MBI, Maslach Burnout Inventory, EE- emotional exhaustion, PA- personal accomplishment; MITS, Mindfulness in Teaching Scale; PSS, Perceived Stress Scale;
